# Supplementary material for: An Algorithm to Identify Target-Selective Ligands – A Case Study of 5-HT7/5-HT1A Receptor Selectivity
Source: PubMed Central journal article supplement (PMC4896471; doi:10.1371/journal.pone.0156986), 2016-06-07

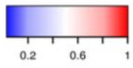

CDKFP

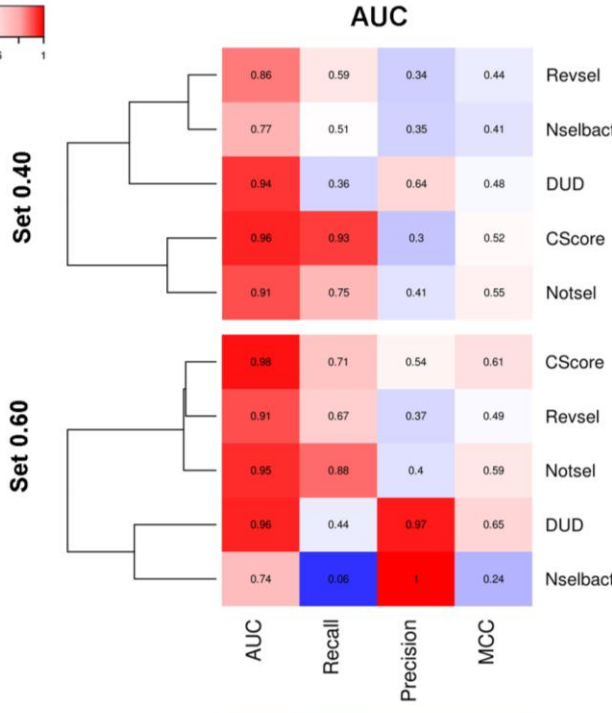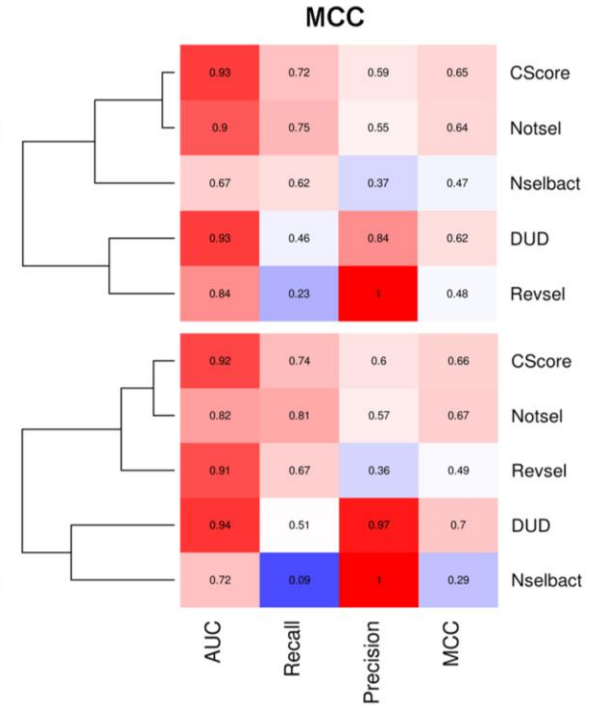

KlekFP

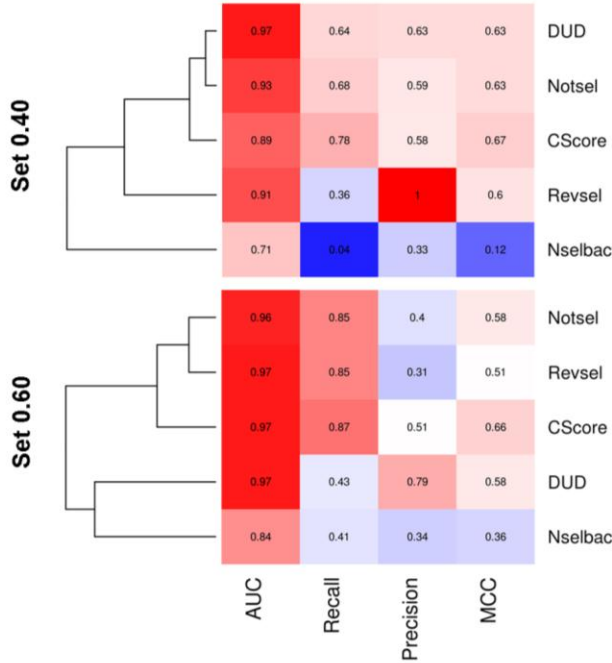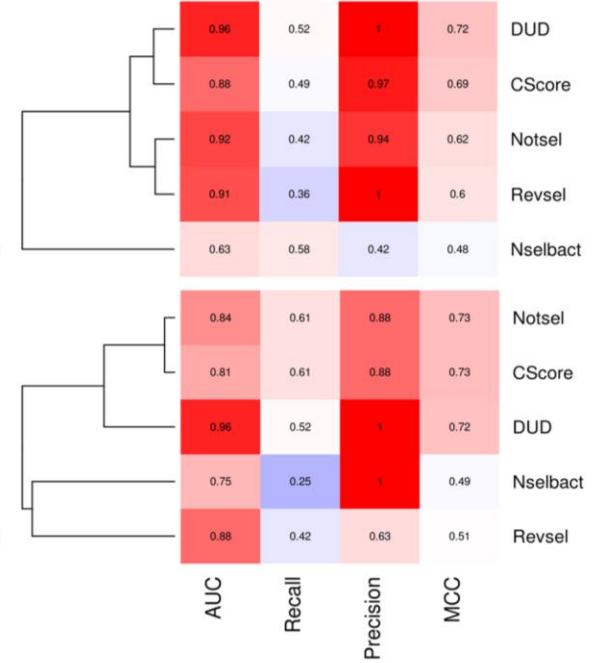

MACCSFP

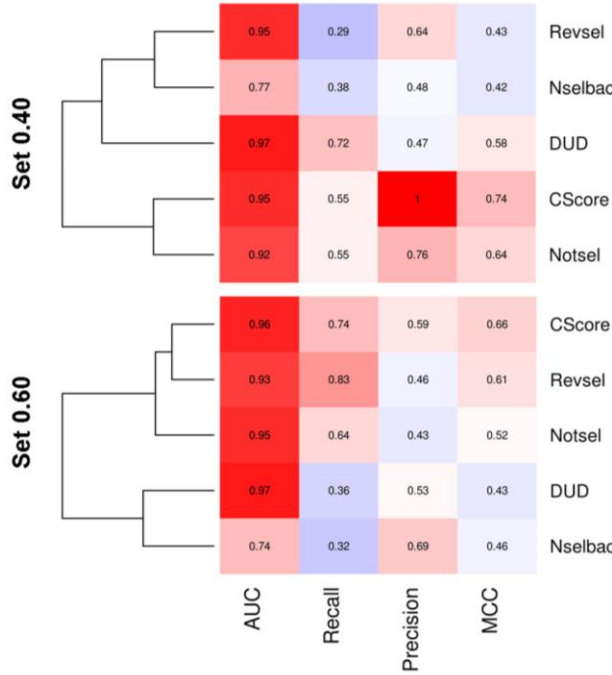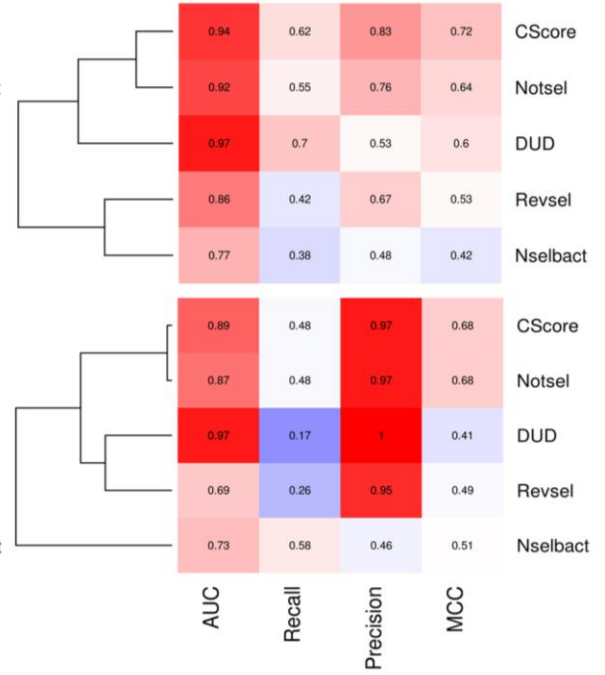

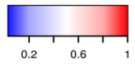

5-HT<sub>1B</sub> nloop

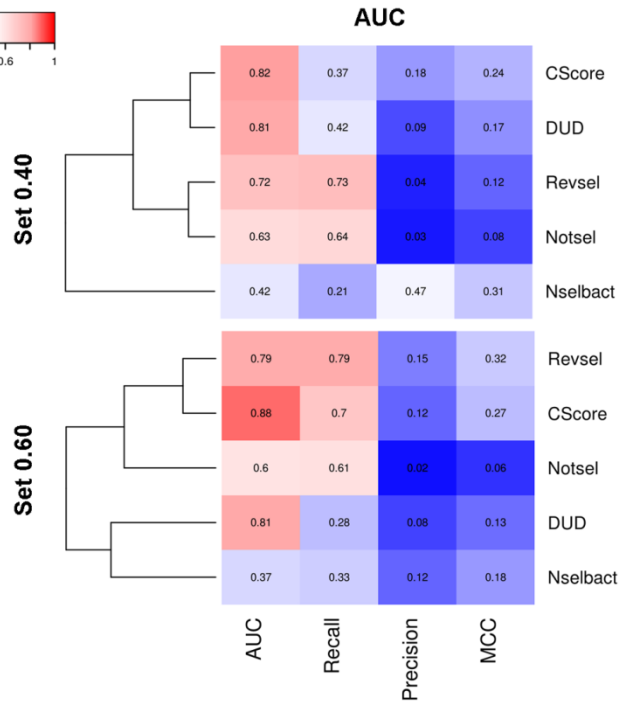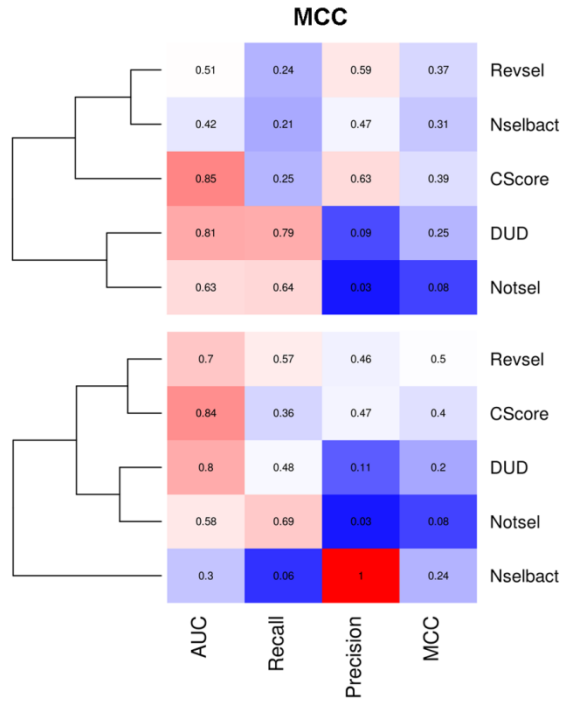

5-HT<sub>1B</sub> loop

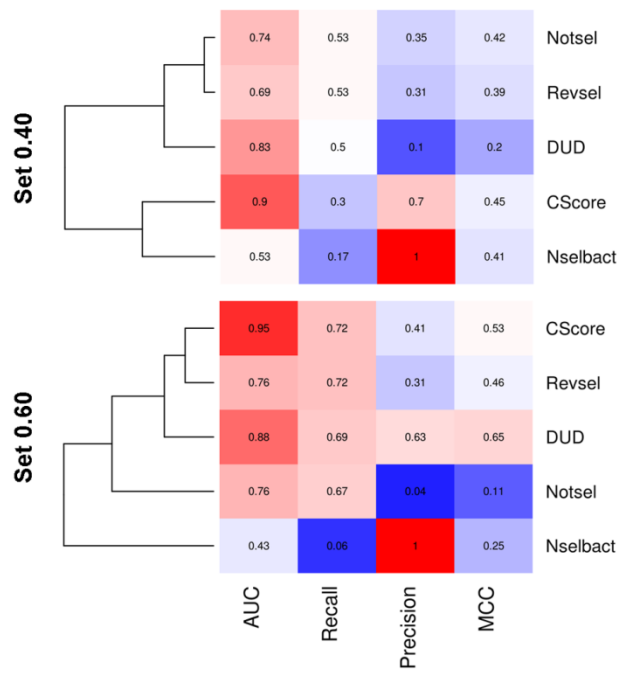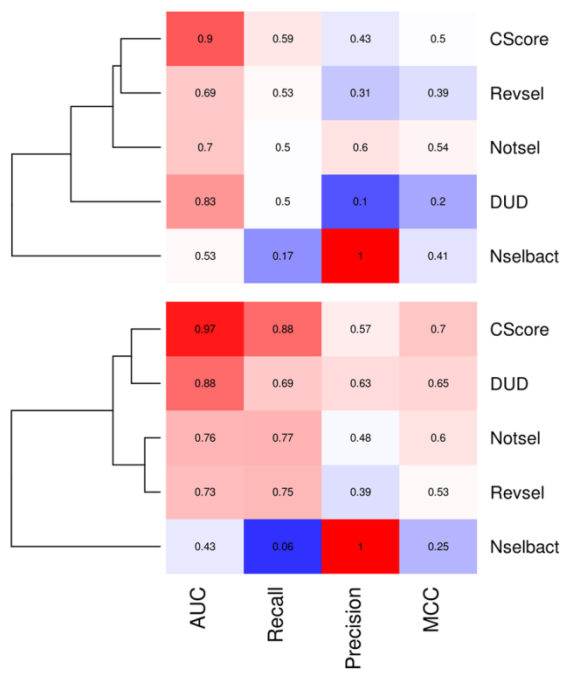

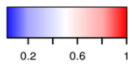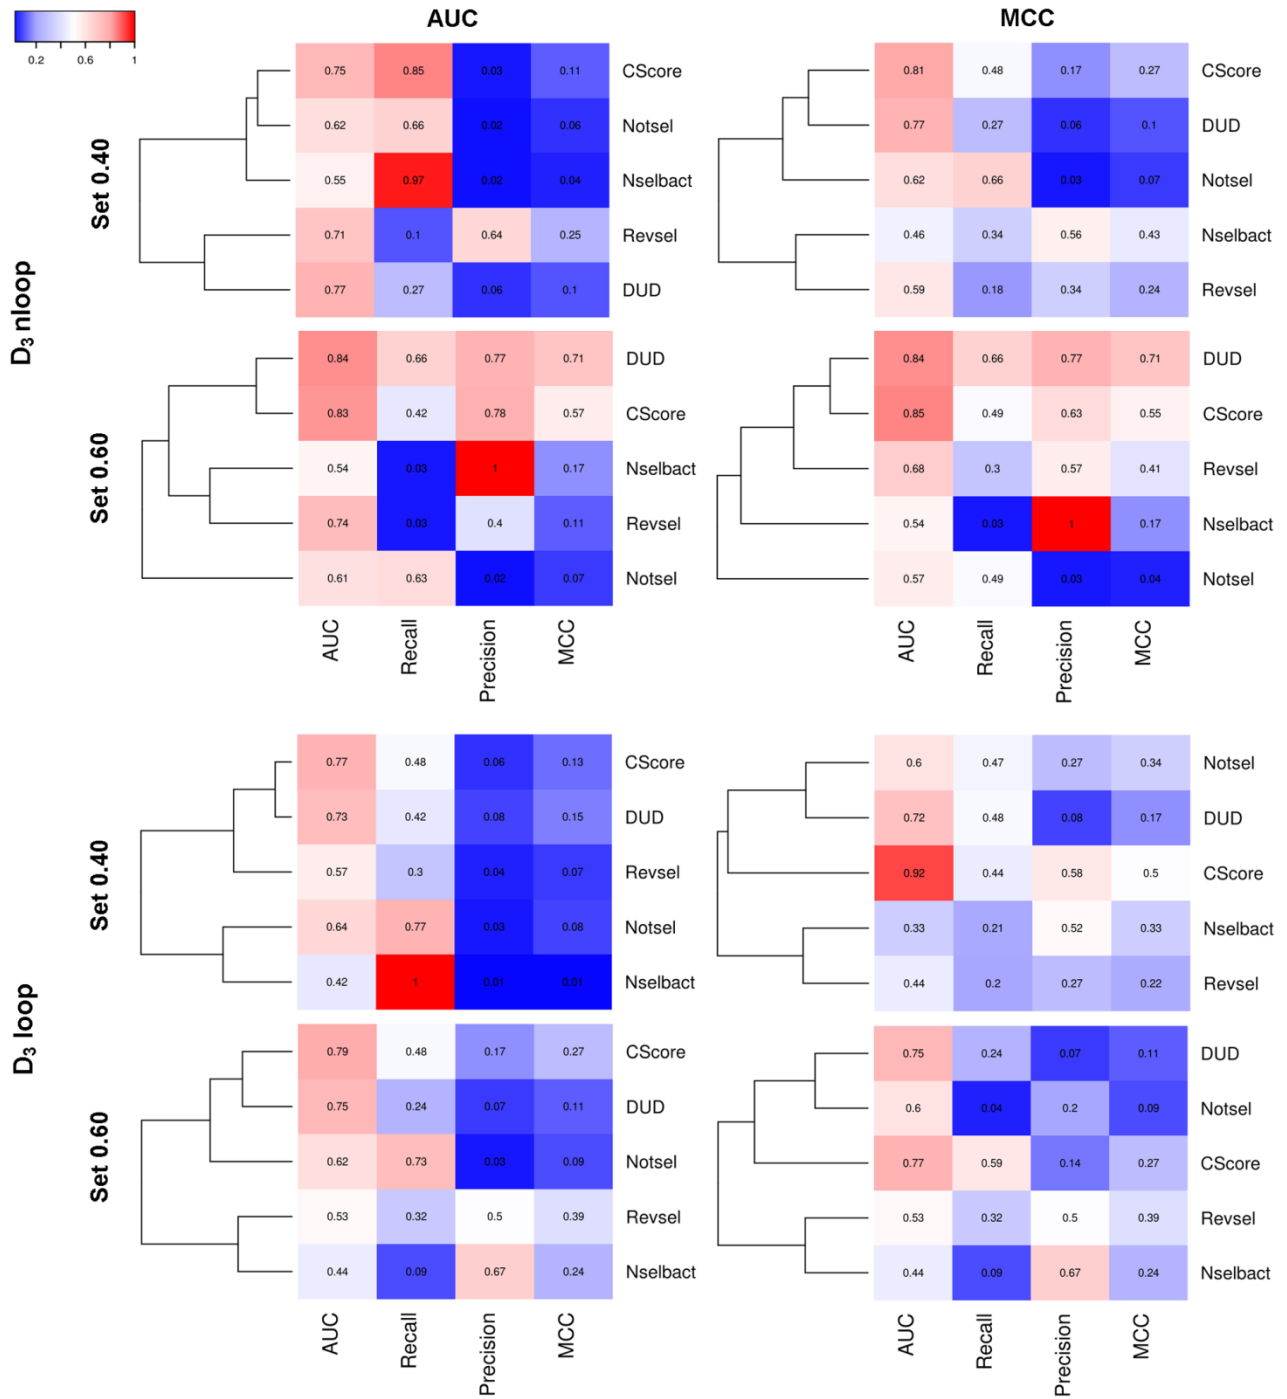

Supplement: pone.0156986.s003.pdf [file pone.0156986.s003.pdf]
